# Supplementary material for: Delayed Demyelination and Impaired Remyelination in Aged Mice in the Cuprizone Model
Source: Cells. 2020 Apr 11;9(4):945. doi: 10.3390/cells9040945 (PMC7226973; doi:10.3390/cells9040945)
Supplement: Supplementary file 1 [file cells-09-00945-s001.zip]

Archive with 12 entries (12 files):
- Supl 1_Experimental_Design.tif
- Supl 2_Myelin_MBP.tif
- Supl 3_Oligodendrocytes_NOGO-A.tif
- Supl 4_Microglia_Iba-1.tif
- Supl 5_lateral cells.tif
- Supl 6_Myelin_MBP.tif
- Supl 7_Oligodendrocytes_NOGO-A.tif
- Supl 8_Microglia_Iba-1.tif
- Supl 9_lateral_CC_remyelination.tif
- Supl 10_Myelin_and_Microglia.tif
- Supplemental figures.docx
- Supplemental figures.pdf
